# Supplementary material for: An unusual mechanism of building up of a high magnetization blocking barrier in an octahedral alkoxide Dy3+-based single-molecule magnet
Source: Royal Society of Chemistry journal article supplement (doi:10.1039/d0qi01267j), 2020-11-27
Supplement: d0qi01267j1.pdf [file d0qi01267j1.pdf]

SUPPORTING INFORMATION

## **An unusual mechanism of building up of high magnetization blocking barrier in an octahedral alkoxide Dy<sup>3+</sup>-based Single-Molecule Magnet**

Jérôme Long,<sup>\*[a]</sup> Aleksei O. Tolpygin,<sup>[b,c]</sup> Ekaterina Mamontova,<sup>[a]</sup> Konstantin A. Lyssenko,<sup>[c,d]</sup> Dan Liu,<sup>[e]</sup> Munirah D. Albaqami,<sup>[f]</sup> Liviu F. Chibotaru,<sup>\*[g]</sup> Yannick Guari,<sup>[a]</sup> Joulia Larionova,<sup>[a]</sup> and Alexander A. Trifonov<sup>\*[b,c]</sup>

*<sup>a</sup>Institut Charles Gerhardt, Equipe Ingénierie Moléculaire et Nano-Objets, Université de Montpellier, ENSCM, CNRS. Place Eugène Bataillon, 34095 Montpellier Cedex 5, France*

*<sup>b</sup>Institute of Organometallic Chemistry of Russian Academy of Sciences, 49 Tropinina str., GSP-445, 630950, Nizhny Novgorod, Russia. E-mail: trif@iomc.ras.ru*

*<sup>c</sup>Institute of Organoelement Compounds of Russian Academy of Sciences, 28 Vavilova str., 119334, Moscow, Russia.*

*<sup>d</sup>Lomonosov Moscow State Univ, Dept. Chem, Leninskie Gory 1, Build 3, Moscow 119991, Russia.*

*<sup>e</sup>Institute of Flexible Electronics (IFE), Northwestern Polytechnical University (NPU), 127 West Youyi Road, Xi'an, 710072, Shaanxi, China.*

*<sup>f</sup>Chemistry Department, College of Science, King Saud University, P.O. Box 2455, Riyadh 11451, Saudi Arabia.*

*<sup>g</sup>Theory of Nanomaterials Group, Katholieke Universiteit Leuven, Celesijnenlaan, 200F, Heverlee, B-3001, Belgium.*

## Table of Contents

|                                                                                                                                                                                                                                                                                                                                                                                           |    |
|-------------------------------------------------------------------------------------------------------------------------------------------------------------------------------------------------------------------------------------------------------------------------------------------------------------------------------------------------------------------------------------------|----|
| Figure S1: Top: the general view of cation in 1 in representation of atoms by thermal ellipsoids (p=50%). Bottom: perspective views of the crystal packing for 1. Hydrogen atoms have been omitted for clarity. ....                                                                                                                                                                      | 5  |
| Figure S2: Temperature dependence of $\chi T$ under an applied magnetic field of 1000 Oe for 1. The red solid line corresponds to the calculated curve obtained by <i>ab initio</i> calculations (CASTP2, full structure). Inset: Field dependence of the magnetization at 1.8 K. The red solid line corresponds to the calculated curves obtained by <i>ab initio</i> calculations. .... | 6  |
| Figure S3. Temperature dependence of $\chi'$ and $\chi''$ under a zero dc-field for 1. ....                                                                                                                                                                                                                                                                                               | 6  |
| Figure S4: Cole-Cole (Argand) plot obtained using the ac susceptibility data for 1 under a zero dc-field. The solid lines correspond to the best fit obtained with a generalized Debye model. ....                                                                                                                                                                                        | 7  |
| Figure S5. Frequency dependence of $\chi'$ and $\chi''$ for compounds 1 (40 K) for various dc fields. ....                                                                                                                                                                                                                                                                                | 8  |
| Figure S6. Field dependence of the relaxation time for 1 (40 K). The solid line represents the fit with Equation 2 : $\tau^{-1} = DH^4T + B_1/(1+B_2H^2) + K$ (Eq. 2). ....                                                                                                                                                                                                               | 8  |
| Figure S7. Frequency dependence of $\chi'$ and $\chi''$ under a 1000 Oe dc-field for 1. ....                                                                                                                                                                                                                                                                                              | 9  |
| Figure S8: Temperature dependence $\chi'$ and $\chi''$ under a 1000 Oe dc-field for 1. ....                                                                                                                                                                                                                                                                                               | 10 |
| Figure S9: Cole-Cole (Argand) plot obtained using the ac susceptibility data for 1 under a 1000 Oe dc field. The solid lines correspond to the best fit obtained with a generalized Debye model. ....                                                                                                                                                                                     | 10 |
| Figure S10: Zero-field cooled (ZFC) and field cooled (FC) curves for 1 obtained under a 2000 Oe dc field. ....                                                                                                                                                                                                                                                                            | 11 |
| Figure S11: Hysteresis loops for 1 at an average sweep rate of 19 Oe.s <sup>-1</sup> in the -5000-5000 Oe interval. ....                                                                                                                                                                                                                                                                  | 11 |
| Figure S12. Room and low temperature (77 K) solid-state excitation spectra for 1 monitored at an emission wavelength of 590 nm. ....                                                                                                                                                                                                                                                      | 12 |

|                                                                                                                                                                                                                                                                                                                                                                                                                                                                                                                                                                                                                                                                                                       |    |
|-------------------------------------------------------------------------------------------------------------------------------------------------------------------------------------------------------------------------------------------------------------------------------------------------------------------------------------------------------------------------------------------------------------------------------------------------------------------------------------------------------------------------------------------------------------------------------------------------------------------------------------------------------------------------------------------------------|----|
| Figure S13. Low temperature (77 K) solid-state emission spectra of 1 acquired at with an excitation wavelength of 387 nm. ....                                                                                                                                                                                                                                                                                                                                                                                                                                                                                                                                                                        | 12 |
| Figure S14. Comparison of the structures and energy diagrams for 1, $[\text{Dy}(\text{O}^{\text{tBu}})_2(\text{py})_5][\text{BPh}_4]$ <sup>[6]</sup> and $[(\text{Cp}^{\text{iPr5}})\text{Dy}(\text{Cp}^*)][\text{B}(\text{C}_6\text{F}_5)_4]$ . <sup>[7]</sup> Only the four first excited states are shown for 1 and $[(\text{Cp}^{\text{iPr5}})\text{Dy}(\text{Cp}^*)][\text{B}(\text{C}_6\text{F}_5)_4]$ . The energy diagrams for $[\text{Dy}(\text{O}^{\text{tBu}})_2(\text{py})_5][\text{BPh}_4]$ and $[(\text{Cp}^{\text{iPr5}})\text{Dy}(\text{Cp}^*)][\text{B}(\text{C}_6\text{F}_5)_4]$ have been plotted from the data reported in the corresponding publications. <sup>[6-7]</sup> ..... | 13 |
| Table S1. Crystal data and structure refinement parameters.....                                                                                                                                                                                                                                                                                                                                                                                                                                                                                                                                                                                                                                       | 14 |
| Table S2. SHAPE analysis for compound 1. ....                                                                                                                                                                                                                                                                                                                                                                                                                                                                                                                                                                                                                                                         | 15 |
| Table S3. Key structural parameters in some pentagonal bipyramidal $[\text{Dy}(\text{OR})_2(\text{L}_{\text{eq}})_5]^+$ alkoxide SMMs: .....                                                                                                                                                                                                                                                                                                                                                                                                                                                                                                                                                          | 15 |
| Table S4. Fitting of the Cole-Cole plots with a generalized Debye model under a zero dc field for 1.....                                                                                                                                                                                                                                                                                                                                                                                                                                                                                                                                                                                              | 16 |
| Table S5. Fit parameters of the field dependence of the relaxation time obtained using the Eq. 3; $\tau^{-1} = \text{DH}^4\text{T} + \text{B}_1/(1+\text{B}_2\text{H}^2) + \text{K}$ (Eq. 3), for which the first term accounts for the direct process (for Kramers-ion), the second one stands for the QTM, while the K constant accounts for the field-independent Raman and thermally activated processes.....                                                                                                                                                                                                                                                                                     | 17 |
| Table S6. Fitting of the Cole-Cole plots with a generalized Debye model under a 1000 Oe dc field for 1.....                                                                                                                                                                                                                                                                                                                                                                                                                                                                                                                                                                                           | 17 |
| Computational details .....                                                                                                                                                                                                                                                                                                                                                                                                                                                                                                                                                                                                                                                                           | 18 |
| Figure S15. Structure of the Dy complex and the main axially of ground KD state. ....                                                                                                                                                                                                                                                                                                                                                                                                                                                                                                                                                                                                                 | 18 |
| Table S7. Contractions of the employed basis set.....                                                                                                                                                                                                                                                                                                                                                                                                                                                                                                                                                                                                                                                 | 18 |
| Table S8. Energies and composition of KDs for the full structure in the CASSCF approximation.....                                                                                                                                                                                                                                                                                                                                                                                                                                                                                                                                                                                                     | 19 |
| Table S9. <i>g</i> tensors of low-lying KD for the full structure in the CASSCF approximation. ....                                                                                                                                                                                                                                                                                                                                                                                                                                                                                                                                                                                                   | 20 |
| Figure S16. The states are placed on the diagram according to their magnetic moments (bold black lines). The horizontal red lines show the tunneling transitions (the energy splitting) within each doublet state, while the nonhorizontal lines show the spin-phonon transition paths. The numbers at non-horizontal lines are averaged transition moments in                                                                                                                                                                                                                                                                                                                                        |    |

|                                                                                                                                                                  |    |
|------------------------------------------------------------------------------------------------------------------------------------------------------------------|----|
| $\mu$ B connecting the corresponding states. The numbers at horizontal lines are tunneling gaps.<br>The green arrows delineate the relaxation path.....          | 21 |
| Figure S17. The reduced structure. ....                                                                                                                          | 22 |
| Table S10. Contractions of the employed basis set.....                                                                                                           | 22 |
| Table S11. Energies and composition of low-lying KD for the reduced structure. ....                                                                              | 23 |
| Table S12. The g tensors of the lowest KDs for the reduced structure.....                                                                                        | 24 |
| Table S13. Calculated energies ( $\text{cm}^{-1}$ ) of the eight lowest KDs arising from the crystal field splitting of the ${}^6\text{H}_{15/2}$ manifold ..... | 25 |
| Figure S18. The same as in Figure 16 for a geometry modified by elongating the four Dy-O bonds in the equatorial plane.....                                      | 26 |
| References .....                                                                                                                                                 | 26 |

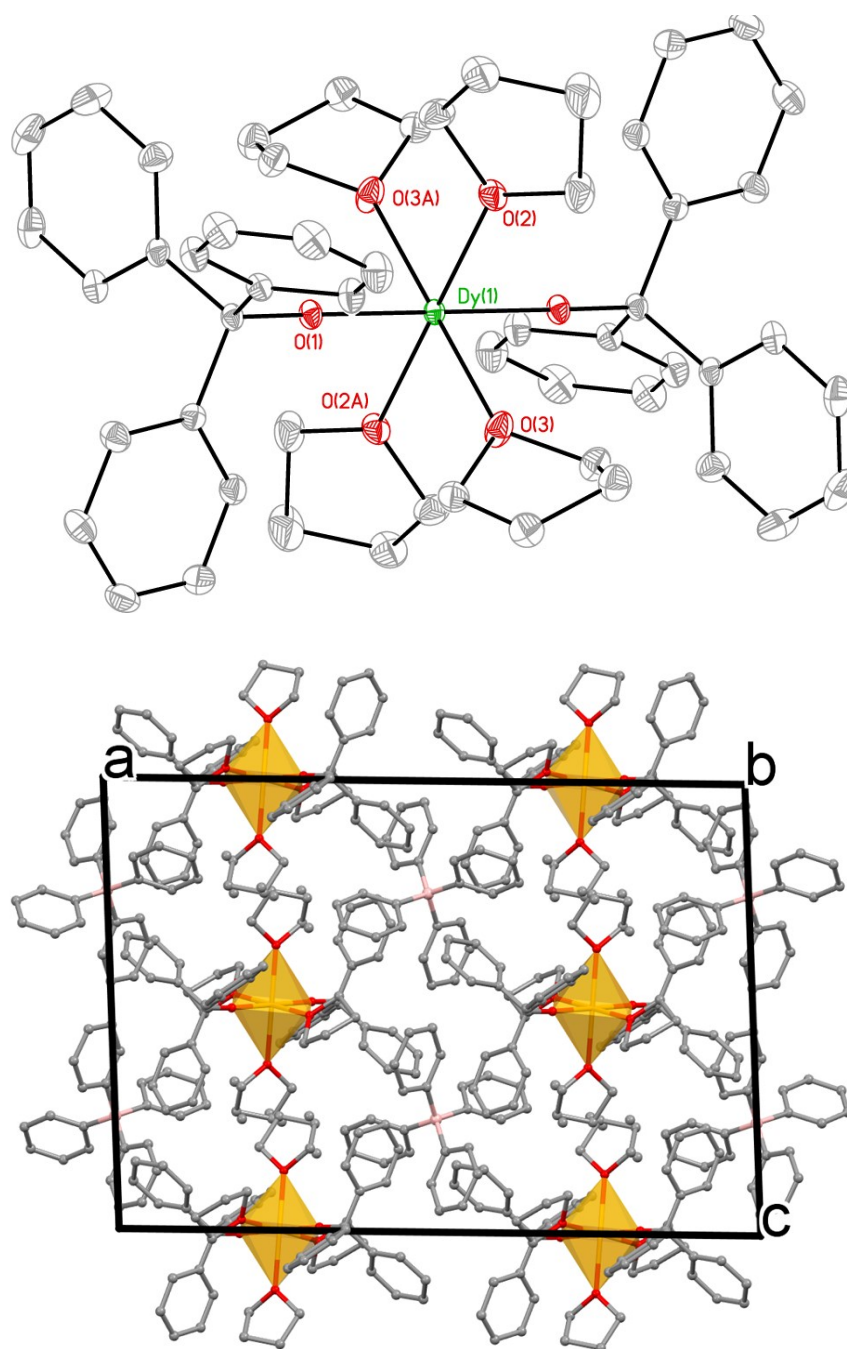

**Figure S1:** Top: the general view of cation in **1** in representation of atoms by thermal ellipsoids ( $p=50\%$ ). Bottom: perspective views of the crystal packing for **1**. Hydrogen atoms have been omitted for clarity.

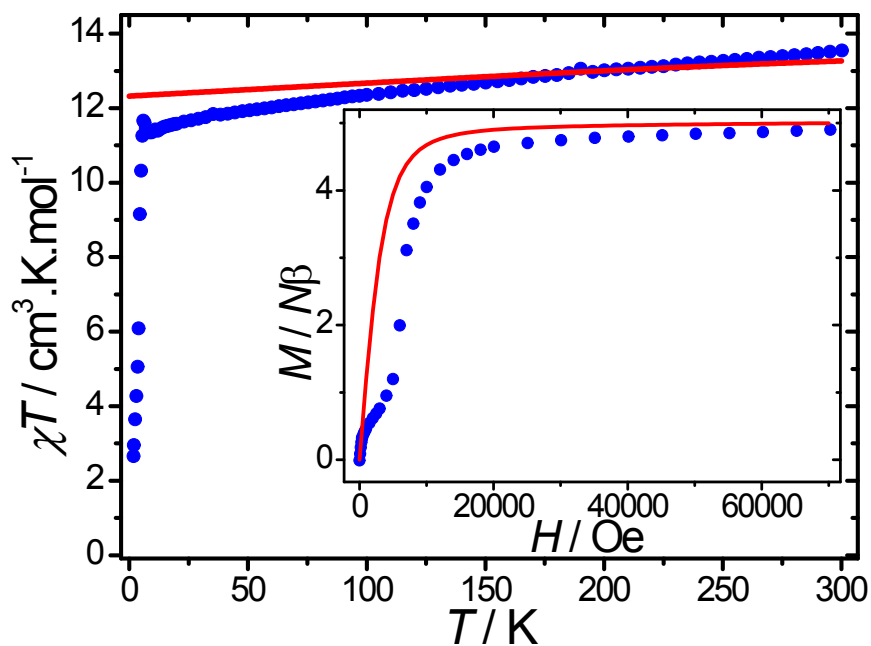

**Figure S2:** Temperature dependence of  $\chi T$  under an applied magnetic field of 1000 Oe for **1**. The red solid line corresponds to the calculated curve obtained by *ab initio* calculations (CASTP2, full structure). Inset: Field dependence of the magnetization at 1.8 K. The red solid line corresponds to the calculated curves obtained by *ab initio* calculations.

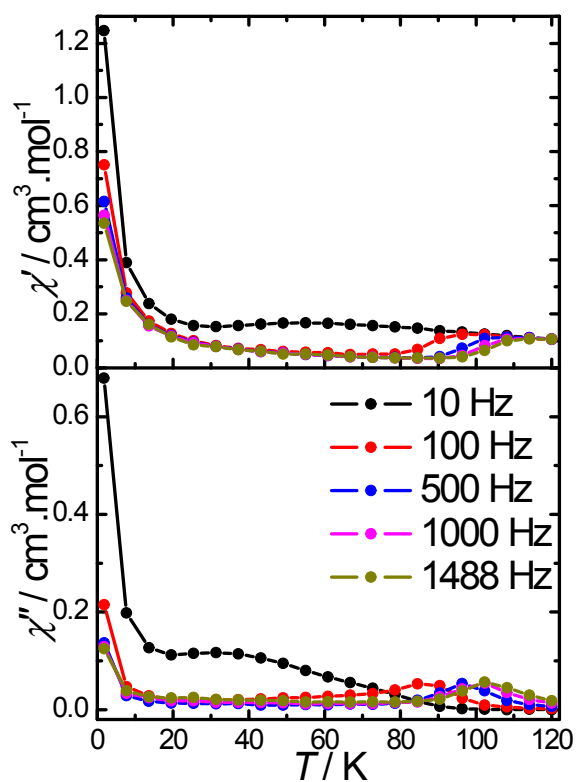

**Figure S3.** Temperature dependence of  $\chi'$  and  $\chi''$  under a zero dc-field for **1**.

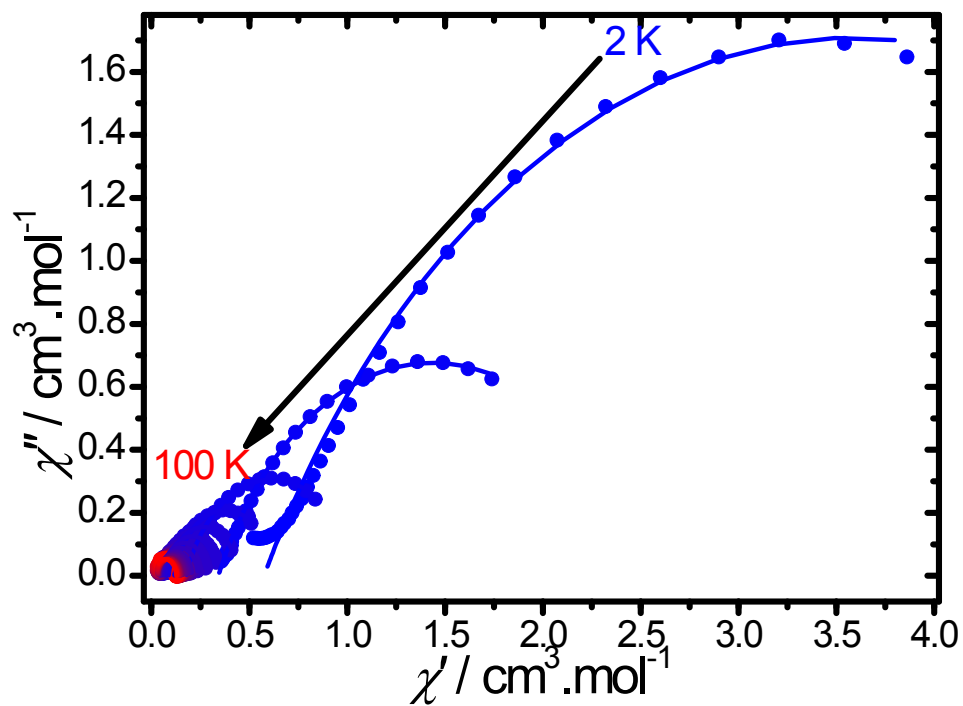

**Figure S4:** Cole-Cole (Argand) plot obtained using the ac susceptibility data for **1** under a zero dc-field. The solid lines correspond to the best fit obtained with a generalized Debye model.

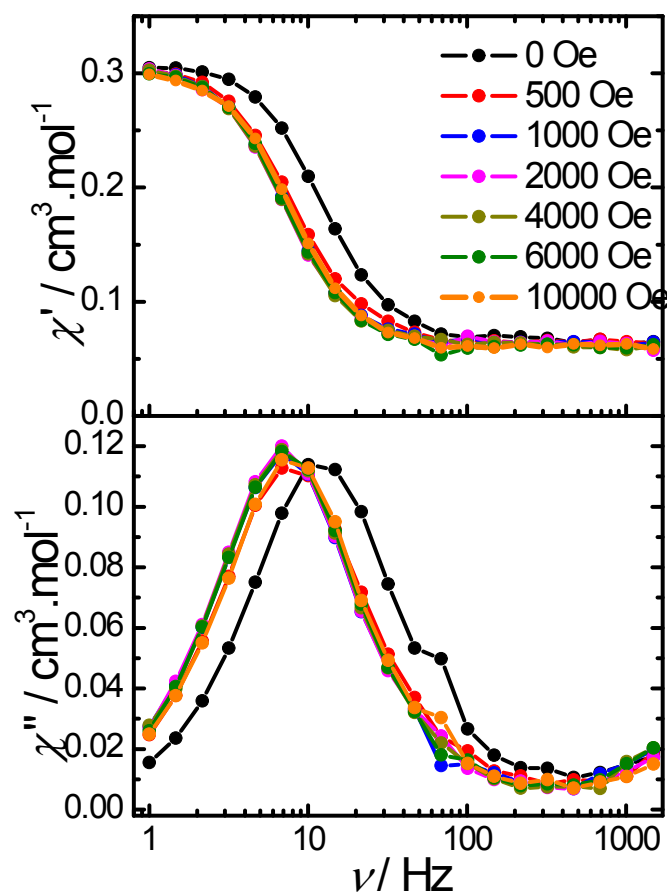

**Figure S5.** Frequency dependence of  $\chi'$  and  $\chi''$  for compounds **1** (40 K) for various dc fields.

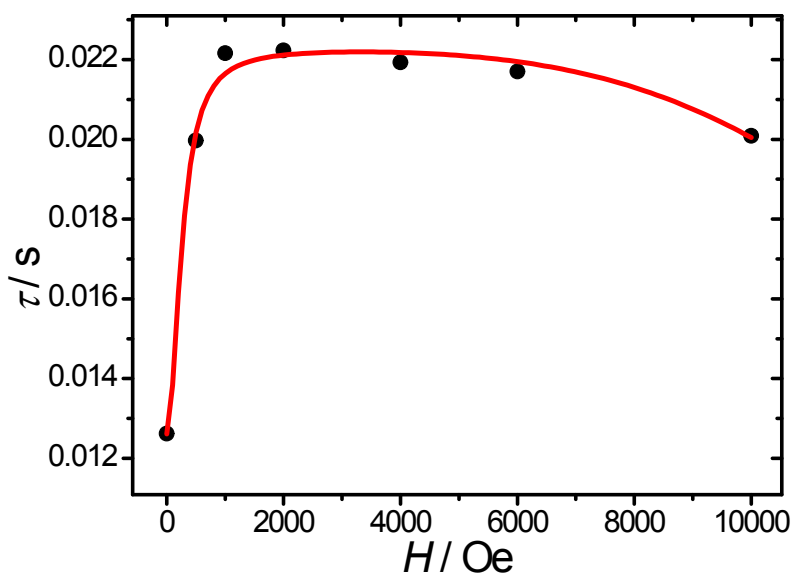

**Figure S6.** Field dependence of the relaxation time for **1** (40 K). The solid line represents the fit with Equation 2 :  $\tau^{-1} = DH^4T + B_1/(1+B_2H^2) + K$  (Eq. 2).



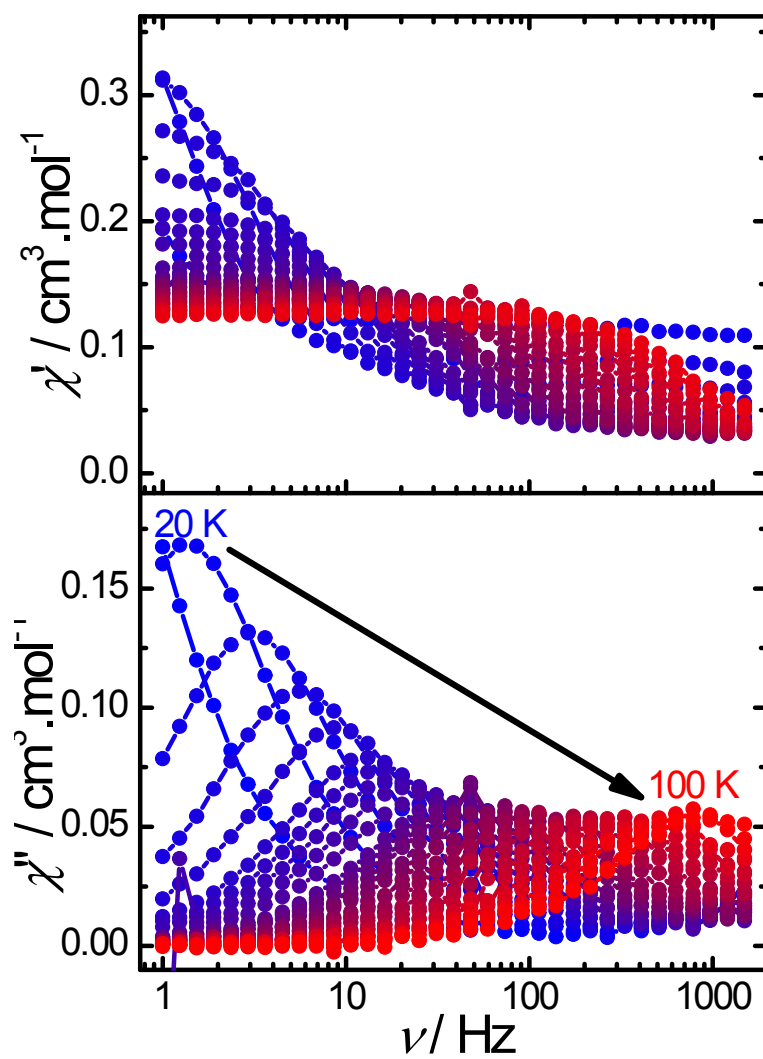

**Figure S7.** Frequency dependence of  $\chi'$  and  $\chi''$  under a 1000 Oe dc-field for **1**.

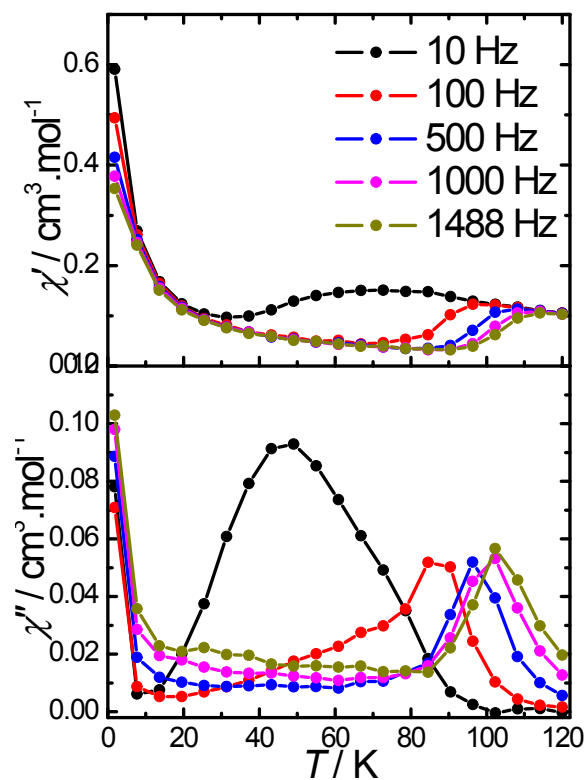

**Figure S8:** Temperature dependence  $\chi'$  and  $\chi''$  under a 1000 Oe dc-field for **1**.

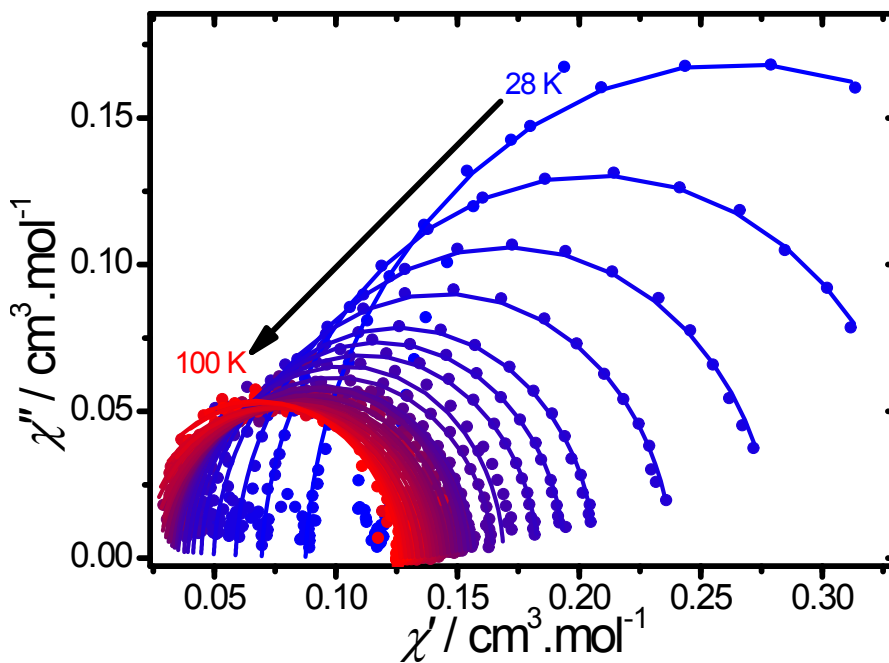

**Figure S9:** Cole-Cole (Argand) plot obtained using the ac susceptibility data for **1** under a 1000 Oe dc field. The solid lines correspond to the best fit obtained with a generalized Debye model.

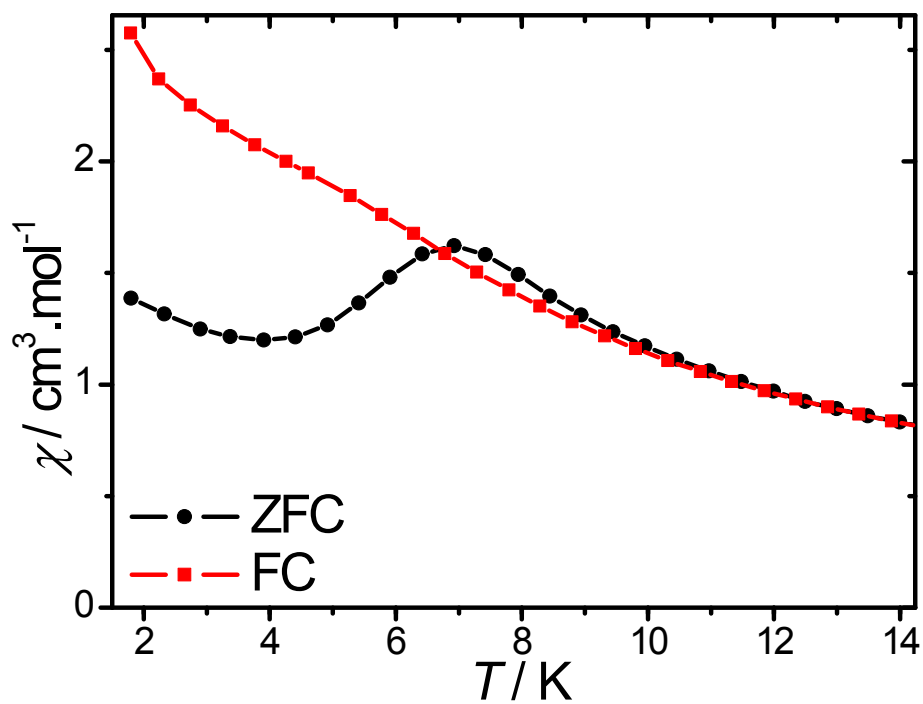

**Figure S10:** Zero-field cooled (ZFC) and field cooled (FC) curves for 1 obtained under a 2000 Oe dc field.

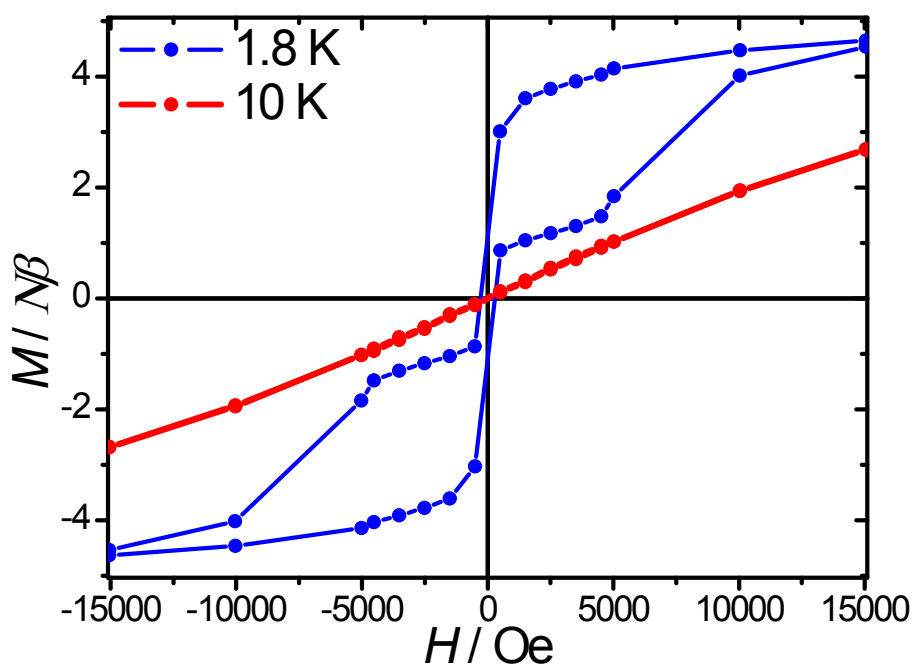

**Figure S11:** Hysteresis loops for 1 at an average sweep rate of  $19 \text{ Oe} \cdot \text{s}^{-1}$  in the  $-5000$ - $5000 \text{ Oe}$  interval.

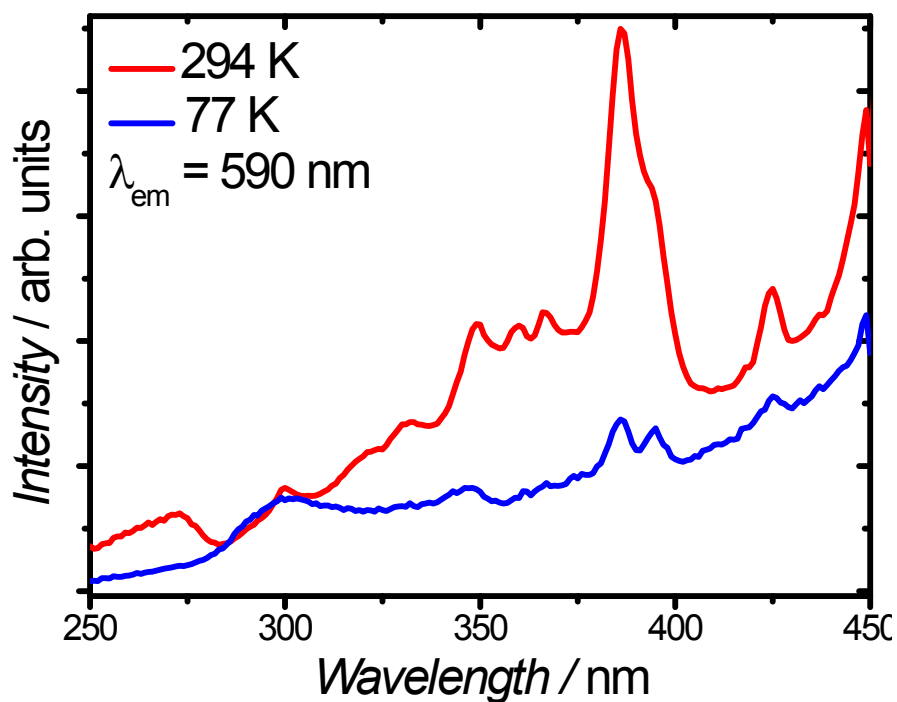

**Figure S12.** Room and low temperature (77 K) solid-state excitation spectra for **1** monitored at an emission wavelength of 590 nm.

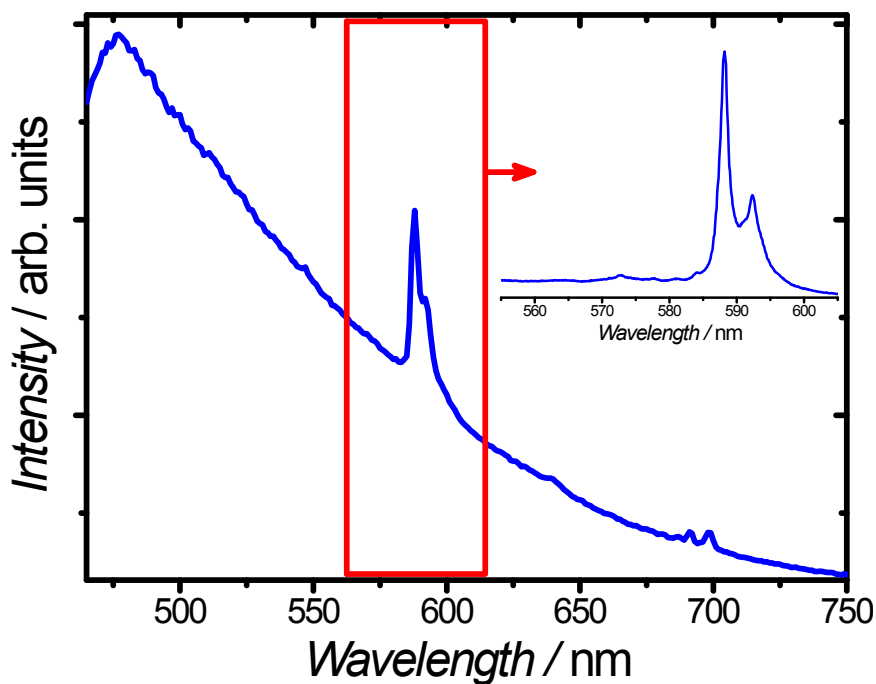

**Figure S13.** Low temperature (77 K) solid-state emission spectra of **1** acquired at with an excitation wavelength of 387 nm.

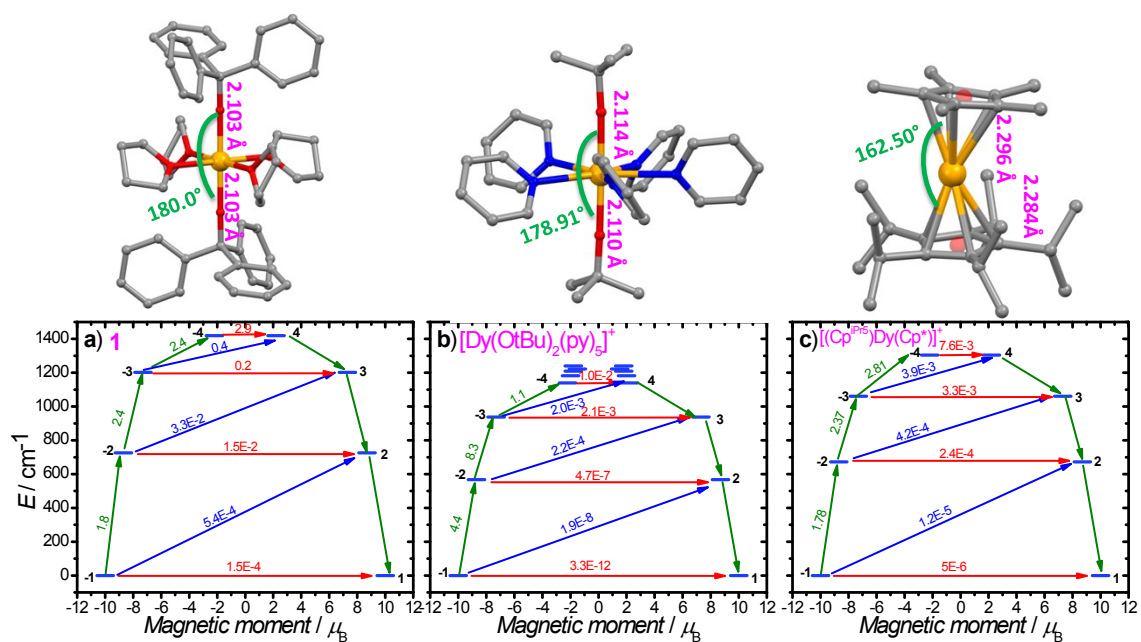

**Figure S14.** Comparison of the structures and energy diagrams for **1**,  $[\text{Dy}(\text{O}^{\text{tBu}})_2(\text{py})_5][\text{BPh}_4]$ <sup>[1]</sup> and  $[(\text{Cp}^{\text{iPr5}})\text{Dy}(\text{Cp}^*)][\text{B}(\text{C}_6\text{F}_5)_4]$ .<sup>[2]</sup> Only the four first excited states are shown for **1** and  $[(\text{Cp}^{\text{iPr5}})\text{Dy}(\text{Cp}^*)][\text{B}(\text{C}_6\text{F}_5)_4]$ . The energy diagrams for  $[\text{Dy}(\text{O}^{\text{tBu}})_2(\text{py})_5][\text{BPh}_4]$  and  $[(\text{Cp}^{\text{iPr5}})\text{Dy}(\text{Cp}^*)][\text{B}(\text{C}_6\text{F}_5)_4]$  have been plotted from the data reported in the corresponding publications.<sup>[1-2]</sup>

**Table S1.** Crystal data and structure refinement parameters.

|                                                            | <b>1</b>                                          |
|------------------------------------------------------------|---------------------------------------------------|
| CCDC                                                       | 1943271                                           |
| Empirical formula                                          | C <sub>78</sub> H <sub>82</sub> BDyO <sub>6</sub> |
| Formula weight                                             | 1288.74                                           |
| Temperature (K)                                            | 120                                               |
| Crystal system                                             | Monoclinic                                        |
| Space group                                                | C2/c                                              |
| Z(Z')                                                      | 4(0.5)                                            |
| <i>a</i> , Å                                               | 25.613(3)                                         |
| <i>b</i> , Å                                               | 13.7071(11)                                       |
| <i>c</i> , Å                                               | 17.8695(14)                                       |
| <i>a</i> , °                                               | 90                                                |
| <i>b</i> , °                                               | 92.698(3)                                         |
| <i>g</i> , °                                               | 90                                                |
| <i>V</i> , Å <sup>3</sup>                                  | 6266.6(9)                                         |
| <i>d</i> <sub>calc</sub> , g.cm <sup>-3</sup>              | 1.366                                             |
| <i>m</i> , cm <sup>-1</sup>                                | 12.48                                             |
| F(000)                                                     | 2676                                              |
| 2 <i>q</i> <sub>max</sub> , °                              | 67.2                                              |
| Refl. collected                                            | 38310                                             |
| Refl. unique ( <i>R</i> <sub>int</sub> )                   | 11640 (0.0282)                                    |
| Refl. with <i>I</i> > 2σ( <i>I</i> )                       | 9438                                              |
| Variables                                                  | 402                                               |
| Final <i>R</i> <sub>1</sub> with <i>I</i> > 2σ( <i>I</i> ) | 0.0256                                            |
| w <i>R</i> <sub>2</sub> (all data)                         | 0.0576                                            |
| GOF                                                        | 1.036                                             |
| <i>d</i> <sub>calc</sub> , g.cm <sup>-3</sup>              | 0.524/-0.604                                      |

**Table S2.** SHAPE analysis for compound **1**.

|   | HP     | PPY    | OC    | TPR    | JPPY   |
|---|--------|--------|-------|--------|--------|
| 1 | 33.286 | 29.340 | 0.337 | 16.930 | 35.152 |

HP: Hexagon  
 PPY: Pentagonal Pyramid  
 OC: Octahedron  
 TPR: Trigonal Prism  
 JPPY: Johnson Pentagonal Pyramid

**Table S3.** Key structural parameters in some pentagonal bipyramidal  $[\text{Dy}(\text{OR})_2(\text{L}_{\text{eq}})_5]^+$  alkoxide SMMs:

| Formula                                                                 | Dy-O <sup>-</sup> Bond lengths           | O-Dy-O angles °         | Ref.             |
|-------------------------------------------------------------------------|------------------------------------------|-------------------------|------------------|
| $[\text{Dy}(\text{OCPh}_3)_2(\text{THF})_4][\text{BPh}_4]$ ( <b>1</b> ) | 2.103(1)                                 | 180°                    | <b>This work</b> |
| $[\text{Dy}(\text{O}^i\text{Bu})_2(\text{py})_5][\text{BPh}_4]$         | 2.110(2)/ 2.114(2)                       | 178.91(9)               | [1] [3]          |
| $[\text{Dy}(\text{OPh})_2(\text{THF})_5][\text{BPh}_4]$                 | 2.123(3)/ 2.131(3)                       | 176.34(10)              | [3]              |
| $[\text{Dy}(\text{OPh})_2(\text{py})_5][\text{BPh}_4]$                  | 2.1226(40)<br>2.1222(41)                 | 176.4(3)<br>176.9(3)    | [3]              |
| $[\text{Dy}(\text{OCH}_2\text{Ph})_2(\text{py})_5][\text{BPh}_4]$       | 2.109(3)/ 2.110(2)<br>2.089(4)/ 2.116(4) | 173.71(17)<br>179.49(5) | [4]              |

**Table S4.** Fitting of the Cole-Cole plots with a generalized Debye model under a zero dc field for **1**.

| $T$ (K) | $\chi_S$ (cm <sup>3</sup> . mol <sup>-1</sup> ) | $\chi_T$ (cm <sup>3</sup> . mol <sup>-1</sup> ) | $\alpha$ |
|---------|-------------------------------------------------|-------------------------------------------------|----------|
| 5       | 0.342                                           | 2.53                                            | 0.295    |
| 12      | 0.177                                           | 1.06                                            | 0.227    |
| 20      | 0.117                                           | 0.64                                            | 0.145    |
| 28      | 0.0871                                          | 0.446                                           | 0.0886   |
| 36      | 0.0706                                          | 0.342                                           | 0.0481   |
| 44      | 0.0585                                          | 0.281                                           | 0.0363   |
| 52      | 0.0518                                          | 0.238                                           | 0.0288   |
| 60      | 0.0444                                          | 0.207                                           | 0.0222   |
| 62.5    | 0.0443                                          | 0.199                                           | 0.0183   |
| 65      | 0.0416                                          | 0.193                                           | 0.0347   |
| 67.5    | 0.0411                                          | 0.186                                           | 0.0335   |
| 70      | 0.0395                                          | 0.179                                           | 0.03     |
| 72.5    | 0.0382                                          | 0.174                                           | 0.0343   |
| 75      | 0.0369                                          | 0.168                                           | 0.0214   |
| 77.5    | 0.0349                                          | 0.163                                           | 0.0415   |
| 80      | 0.0346                                          | 0.158                                           | 0.0305   |
| 81      | 0.0345                                          | 0.156                                           | 0.0334   |
| 82      | 0.0339                                          | 0.154                                           | 0.0392   |
| 83      | 0.0327                                          | 0.153                                           | 0.043    |
| 84      | 0.0331                                          | 0.151                                           | 0.0355   |
| 85      | 0.0316                                          | 0.15                                            | 0.0357   |
| 86      | 0.0307                                          | 0.147                                           | 0.0452   |
| 87      | 0.0305                                          | 0.146                                           | 0.0386   |
| 88      | 0.0295                                          | 0.144                                           | 0.0284   |
| 89      | 0.0295                                          | 0.143                                           | 0.042    |
| 90      | 0.0296                                          | 0.142                                           | 0.0413   |
| 91      | 0.0268                                          | 0.14                                            | 0.0487   |
| 92      | 0.0254                                          | 0.138                                           | 0.0541   |
| 93      | 0.0249                                          | 0.137                                           | 0.0524   |
| 94      | 0.0234                                          | 0.135                                           | 0.0521   |
| 95      | 0.0222                                          | 0.134                                           | 0.0551   |
| 96      | 0.0223                                          | 0.132                                           | 0.0448   |
| 97      | 0.0215                                          | 0.131                                           | 0.0277   |
| 98      | 0.0193                                          | 0.13                                            | 0.0327   |
| 99      | 0.0193                                          | 0.13                                            | 0.0327   |
| 100     | 0.00963                                         | 0.128                                           | 0.063    |



**Table S5.** Fit parameters of the field dependence of the relaxation time obtained using the Eq. 3;  $\tau^{-1} = DH^4T + B_1/(1+B_2H^2) + K$  (Eq. 3), for which the first term accounts for the direct process (for Kramers-ion), the second one stands for the QTM, while the K constant accounts for the field-independent Raman and thermally activated processes.

| Compound        | $D$ ( $s^{-1}K^{-1}Oe^{-4}$ ) | $B_1$ ( $s^{-1}$ ) | $B_2$ ( $Oe^{-2}$ )   | $K$  |
|-----------------|-------------------------------|--------------------|-----------------------|------|
| <b>1</b> (40 K) | $1.2 \times 10^{-17}$         | 34.4               | $2.51 \times 10^{-5}$ | 44.9 |

**Table S6.** Fitting of the Cole-Cole plots with a generalized Debye model under a 1000 Oe dc field for **1**.

| $T$ (K) | $\chi_S$ ( $cm^3 \cdot mol^{-1}$ ) | $\chi_T$ ( $cm^3 \cdot mol^{-1}$ ) | $\alpha$ |
|---------|------------------------------------|------------------------------------|----------|
| 28      | 0.0875                             | 0.443                              | 0.0334   |
| 36      | 0.0695                             | 0.344                              | 0.0322   |
| 44      | 0.0587                             | 0.281                              | 0.0309   |
| 52      | 0.0497                             | 0.239                              | 0.0295   |
| 60      | 0.0446                             | 0.207                              | 0.0199   |
| 64      | 0.0412                             | 0.194                              | 0.0247   |
| 68      | 0.039                              | 0.183                              | 0.0263   |
| 72      | 0.0377                             | 0.169                              | 0.00187  |
| 76      | 0.0349                             | 0.165                              | 0.0341   |
| 80      | 0.0339                             | 0.157                              | 0.0355   |
| 81      | 0.0334                             | 0.154                              | 0.0205   |
| 82      | 0.0323                             | 0.153                              | 0.0339   |
| 83      | 0.0327                             | 0.151                              | 0.0102   |
| 84      | 0.0305                             | 0.15                               | 0.053    |
| 85      | 0.0312                             | 0.148                              | 0.0304   |
| 86      | 0.0291                             | 0.146                              | 0.0527   |
| 87      | 0.0293                             | 0.145                              | 0.0411   |
| 88      | 0.0274                             | 0.143                              | 0.052    |
| 89      | 0.0271                             | 0.142                              | 0.0562   |
| 90      | 0.0269                             | 0.14                               | 0.0587   |
| 91      | 0.0268                             | 0.139                              | 0.0396   |
| 92      | 0.0239                             | 0.138                              | 0.0629   |
| 93      | 0.0211                             | 0.136                              | 0.0657   |
| 94      | 0.0198                             | 0.134                              | 0.064    |
| 95      | 0.0213                             | 0.134                              | 0.0565   |
| 96      | 0.016                              | 0.131                              | 0.0716   |
| 97      | 0.019                              | 0.13                               | 0.0522   |
| 98      | 0.0123                             | 0.129                              | 0.0585   |
| 99      | 0.0141                             | 0.127                              | 0.0403   |
| 100     | 0.0078                             | 0.127                              | 0.0655   |

## Computational details

CASSCF/RASSI&CASPT2/RASSI for the reduced structure

All calculations were carried out with MOLCAS 8.3.<sup>[5]</sup> The employed structure of  $[\text{Dy}(\text{OCPh}_3)_2(\text{THF})_4][\text{BPh}_4]$  is shown in Figure S14.

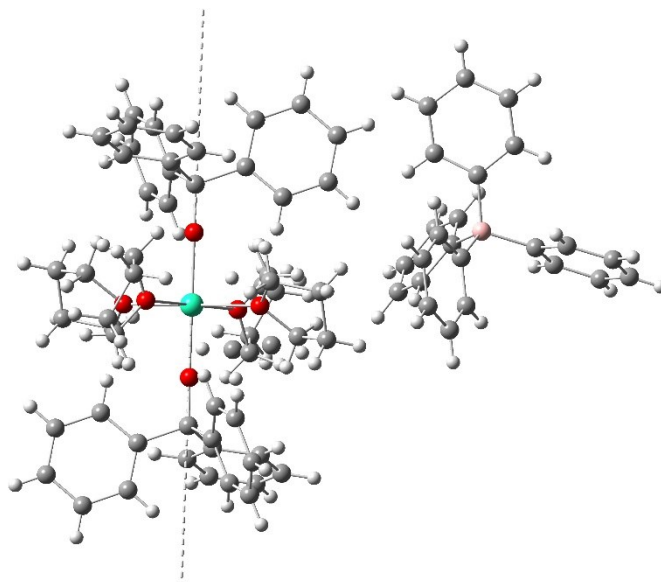

**Figure S15.** Structure of the Dy complex and the main axially of ground KD state.

**Table S7.** Contractions of the employed basis set.

| Basis set                        |
|----------------------------------|
| <b>DY.ANO-RCC...8S7P5D3F2G1H</b> |
| <b>B.ANO-RCC...3S2P</b>          |
| <b>O.ANO-RCC...3S2P</b>          |
| <b>C.ANO-RCC...3S2P</b>          |
| <b>H.ANO-RCC...2S</b>            |

Active space of the CASSCF method included 9 electrons in 7 orbitals for Dy ( $4f$  orbitals of  $\text{Dy}^{3+}$  ion). On the basis of the resulting spin-orbital multiplets SINGLE\_ANISO module<sup>[6]</sup> computed local magnetic properties ( $g$ -tensors, magnetic axes, local magnetic susceptibility, magnetization blocking barrier etc.)

**Table S8.** Energies and composition of KDs for the full structure in the CASSCF approximation.

| KD | Spin-orbit energies, cm <sup>-1</sup> | Crystal field Wavefunction                                                                                                                                                                                                     |
|----|---------------------------------------|--------------------------------------------------------------------------------------------------------------------------------------------------------------------------------------------------------------------------------|
| 1  | 0.000                                 | 99.8% $\left  \pm \frac{15}{2} \right\rangle$                                                                                                                                                                                  |
| 2  | 557.877                               | 98.4% $\left  \pm \frac{13}{2} \right\rangle$                                                                                                                                                                                  |
| 3  | 930.498                               | 88.3% $\left  \pm \frac{11}{2} \right\rangle$                                                                                                                                                                                  |
| 4  | 1084.375                              | 33.7% $\left  \pm \frac{9}{2} \right\rangle + 46.1% \left  \pm \frac{1}{2} \right\rangle$                                                                                                                                      |
| 5  | 1193.179                              | 37.9% $\left  \pm \frac{9}{2} \right\rangle + 12.5% \left  \pm \frac{7}{2} \right\rangle + 29.5% \left  \pm \frac{3}{2} \right\rangle$                                                                                         |
| 6  | 1231.856                              | 31.9% $\left  \pm \frac{7}{2} \right\rangle + 36.4% \left  \pm \frac{5}{2} \right\rangle + 16.7% \left  \pm \frac{3}{2} \right\rangle$                                                                                         |
| 7  | 1318.591                              | 15.9% $\left  \pm \frac{9}{2} \right\rangle + 10.1% \left  \pm \frac{7}{2} \right\rangle + 16.2% \left  \pm \frac{5}{2} \right\rangle + 26.8% \left  \pm \frac{3}{2} \right\rangle + 27% \left  \pm \frac{1}{2} \right\rangle$ |
| 8  | 1348.512                              | 37.3% $\left  \pm \frac{7}{2} \right\rangle + 31.1% \left  \pm \frac{5}{2} \right\rangle + 13.2% \left  \pm \frac{3}{2} \right\rangle + 11.9% \left  \pm \frac{1}{2} \right\rangle$                                            |

**Table S9.**  $g$  tensors of low-lying KD for the full structure in the CASSCF approximation.

| KD       |       | CASSCF |
|----------|-------|--------|
|          |       | $g$    |
| <b>1</b> | $g_x$ | 0.000  |
|          | $g_y$ | 0.000  |
|          | $g_z$ | 19.866 |
| <b>2</b> | $g_x$ | 0.048  |
|          | $g_y$ | 0.051  |
|          | $g_z$ | 16.820 |
| <b>3</b> | $g_x$ | 0.350  |
|          | $g_y$ | 0.746  |
|          | $g_z$ | 13.213 |
| <b>4</b> | $g_x$ | 4.104  |
|          | $g_y$ | 6.066  |
|          | $g_z$ | 11.470 |
| <b>5</b> | $g_x$ | 2.195  |
|          | $g_y$ | 2.996  |
|          | $g_z$ | 9.795  |
| <b>6</b> | $g_x$ | 0.852  |
|          | $g_y$ | 5.471  |
|          | $g_z$ | 13.654 |
| <b>7</b> | $g_x$ | 0.074  |
|          | $g_y$ | 3.268  |
|          | $g_z$ | 14.470 |
| <b>8</b> | $g_x$ | 0.386  |
|          | $g_y$ | 3.221  |
|          | $g_z$ | 15.823 |

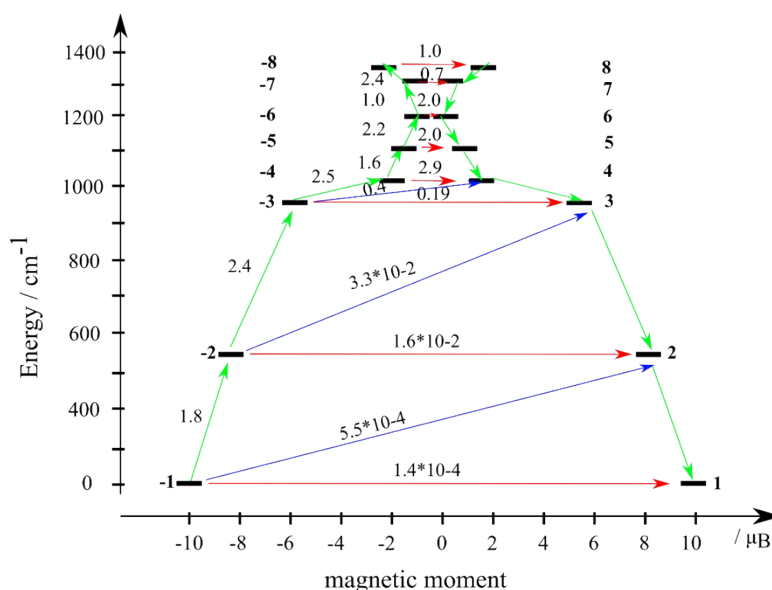

**Figure S16.** The states are placed on the diagram according to their magnetic moments (bold black lines). The horizontal red lines show the tunneling transitions (the energy splitting) within each doublet state, while the nonhorizontal lines show the spin-phonon transition paths. The numbers at non-horizontal lines are averaged transition moments in  $\mu\text{B}$  connecting the corresponding states. The numbers at horizontal lines are tunneling gaps. The green arrows delineate the relaxation path.

### CASSCF/RASSI & CASPT2/RASSI for the reduced structure

Because the experimental structure is too large for a CASPT2 treatment, we employed a recently proposed methodology<sup>[7]</sup> to evaluate the CASPT2 correction to the crystal field (CF) based on the calculations of a reduced fragment of the structure. The idea is to extract the CF parameters from CASSCF/RASSI and CASPT2/RASSI calculations for a core of the structure (reduced structure). Then the correction due to dynamical correlation is simply the difference of the corresponding CF parameters. The latter is added to the CF parameters derived from CASSCF/RASSI of the full (experimental) structure described in the previous section. The extraction of CF parameters at each calculations is done routinely with the SINGLE\_ANISO module of MOLCAS package.<sup>[6]</sup>

The experimental structure of was cut to a fragment where the  $\text{B}(\text{C}_6\text{H}_5)_4$  was omitted and  $\text{C}(\text{C}_6\text{H}_5)_3$  and  $\text{C}_4\text{H}_8\text{O}$  groups have been replaced with  $\text{CH}_3$  and  $\text{H}_2\text{O}$  groups, respectively (Figure S16).

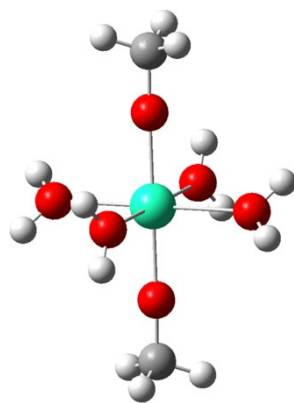

**Figure S17.** The reduced structure.

**Table S10.** Contractions of the employed basis set.

| Basis set                       |
|---------------------------------|
| <b>DY.ANO-RCC...7S6P4D2F1G.</b> |
| <b>O.ANO-RCC...3S2P</b>         |
| <b>C.ANO-RCC...3S2P</b>         |
| <b>H.ANO-RCC...2S</b>           |

**Table S11.** Energies and composition of low-lying KD for the reduced structure.

| KD | Spin-orbit energies, $\text{cm}^{-1}$ | Crystal field Wavefunction                                                                                                                                                             | Spin-orbit energies, $\text{cm}^{-1}$ | Wavefunctions' composition                                                                                                                                                             |
|----|---------------------------------------|----------------------------------------------------------------------------------------------------------------------------------------------------------------------------------------|---------------------------------------|----------------------------------------------------------------------------------------------------------------------------------------------------------------------------------------|
|    | CASSCF                                | CASSCF                                                                                                                                                                                 | CASPT2                                | CASPT2                                                                                                                                                                                 |
| 1  | 0.000                                 | 99.9% $\left  \pm \frac{15}{2} \right\rangle$                                                                                                                                          | 0.000                                 | 99.9% $\left  \pm \frac{15}{2} \right\rangle$                                                                                                                                          |
| 2  | 630.812                               | 99.3% $\left  \pm \frac{13}{2} \right\rangle$                                                                                                                                          | 797.239                               | 99.7% $\left  \pm \frac{13}{2} \right\rangle$                                                                                                                                          |
| 3  | 1098.491                              | 96% $\left  \pm \frac{11}{2} \right\rangle$                                                                                                                                            | 1362.508                              | 98.4% $\left  \pm \frac{11}{2} \right\rangle$                                                                                                                                          |
| 4  | 1375.834                              | 74.5% $\left  \pm \frac{9}{2} \right\rangle + 16.6\% \left  \pm \frac{1}{2} \right\rangle$                                                                                             | 1691.935                              | 89.6% $\left  \pm \frac{9}{2} \right\rangle$                                                                                                                                           |
| 5  | 1488.473                              | 12.9% $\left  \pm \frac{9}{2} \right\rangle + 31\% \left  \pm \frac{7}{2} \right\rangle + 19.4\% \left  \pm \frac{3}{2} \right\rangle + 25.5\% \left  \pm \frac{1}{2} \right\rangle$   | 1792.499                              | 27.8% $\left  \pm \frac{7}{2} \right\rangle + 10.8\% \left  \pm \frac{5}{2} \right\rangle + 23.5\% \left  \pm \frac{3}{2} \right\rangle + 35.7\% \left  \pm \frac{1}{2} \right\rangle$ |
| 6  | 1552.088                              | 27% $\left  \pm \frac{7}{2} \right\rangle + 38.2\% \left  \pm \frac{5}{2} \right\rangle + 27.1\% \left  \pm \frac{3}{2} \right\rangle$                                                 | 1865.566                              | 40.4% $\left  \pm \frac{7}{2} \right\rangle + 30.1\% \left  \pm \frac{5}{2} \right\rangle + 20.4\% \left  \pm \frac{3}{2} \right\rangle$                                               |
| 7  | 1622.774                              | 16.4% $\left  \pm \frac{7}{2} \right\rangle + 11\% \left  \pm \frac{5}{2} \right\rangle + 23.6\% \left  \pm \frac{3}{2} \right\rangle + 40.4\% \left  \pm \frac{1}{2} \right\rangle$   | 1935.130                              | 13.9% $\left  \pm \frac{7}{2} \right\rangle + 10.8\% \left  \pm \frac{5}{2} \right\rangle + 23.3\% \left  \pm \frac{3}{2} \right\rangle + 47.8\% \left  \pm \frac{1}{2} \right\rangle$ |
| 8  | 1667.206                              | 18.9% $\left  \pm \frac{7}{2} \right\rangle + 37.9\% \left  \pm \frac{5}{2} \right\rangle + 25.6\% \left  \pm \frac{3}{2} \right\rangle + 14.6\% \left  \pm \frac{1}{2} \right\rangle$ | 1977.414                              | 15.5% $\left  \pm \frac{7}{2} \right\rangle + 44.7\% \left  \pm \frac{5}{2} \right\rangle + 30.7\% \left  \pm \frac{3}{2} \right\rangle$                                               |

**Table S12.** The  $g$  tensors of the lowest KDs for the reduced structure.

| KD       |       | CASSCF | CASPT2 |
|----------|-------|--------|--------|
|          |       | $g$    | $g$    |
| <b>1</b> | $g_x$ | 0.000  | 0.000  |
|          | $g_y$ | 0.000  | 0.001  |
|          | $g_z$ | 19.876 | 19.869 |
| <b>2</b> | $g_x$ | 0.012  | 0.009  |
|          | $g_y$ | 0.013  | 0.011  |
|          | $g_z$ | 16.866 | 16.793 |
| <b>3</b> | $g_x$ | 0.058  | 0.075  |
|          | $g_y$ | 0.090  | 0.092  |
|          | $g_z$ | 13.914 | 13.996 |
| <b>4</b> | $g_x$ | 3.269  | 1.208  |
|          | $g_y$ | 4.856  | 1.483  |
|          | $g_z$ | 9.316  | 10.887 |
| <b>5</b> | $g_x$ | 9.969  | 2.174  |
|          | $g_y$ | 6.669  | 3.625  |
|          | $g_z$ | 1.696  | 15.219 |
| <b>6</b> | $g_x$ | 1.085  | 2.489  |
|          | $g_y$ | 2.199  | 3.778  |
|          | $g_z$ | 15.262 | 12.694 |
| <b>7</b> | $g_x$ | 0.458  | 0.425  |
|          | $g_y$ | 0.597  | 0.880  |
|          | $g_z$ | 17.792 | 17.035 |
| <b>8</b> | $g_x$ | 0.028  | 0.2295 |
|          | $g_y$ | 0.475  | 0.809  |
|          | $g_z$ | 18.326 | 17.613 |



**Table S13.** Calculated energies ( $\text{cm}^{-1}$ ) of the eight lowest KDs arising from the crystal field splitting of the  ${}^6\text{H}_{15/2}$  manifold

| KD | Full structure | Reduced structure |          | Full structure<br>(CASPT2 corrected<br>CF) <sup>b</sup> |
|----|----------------|-------------------|----------|---------------------------------------------------------|
|    | CASSCF         | CASSCF            | CASPT2   |                                                         |
| 1  | 0.000          | 0.000             | 0.000    | 0.000                                                   |
| 2  | 557.877        | 630.812           | 797.239  | 725.654                                                 |
| 3  | 930.498        | 1098.491          | 1362.508 | 1202.049                                                |
| 4  | 1084.375       | 1375.834          | 1691.935 | 1419.717                                                |
| 5  | 1193.179       | 1488.473          | 1792.499 | 1480.346                                                |
| 6  | 1231.856       | 1552.088          | 1865.566 | 1536.032                                                |
| 7  | 1318.591       | 1622.774          | 1935.130 | 1594.644                                                |
| 8  | 1348.512       | 1667.206          | 1977.414 | 1691.693                                                |

<sup>b</sup> Calculated by diagonalizing a CF Hamiltonian obtained as a sum of the CF from a CASSCF calculation on the full structure and a correction due to dynamic electron correlation obtained as a difference of CF from a CASSCF and a CASPT2 calculation for the reduced structure.<sup>[3]</sup>

### **CASSCF/RASSI & CASPT2/RASSI calculations for the a structure with elongated equatorial Dy-O bonds**

In order to investigate the effect of weakening of the equatorial crystal field on the blocking properties of complex, its geometry has been modified with respect to the experimental one (Figure S15) by elongating the four equatorial Dy-O bonds by 0.1 Å. The CASSCF/RASSI & CASPT2/RASSI calculations have been done in the similar way to the original structure (see above). The resulting blocking barrier is shown in Fig. 18.

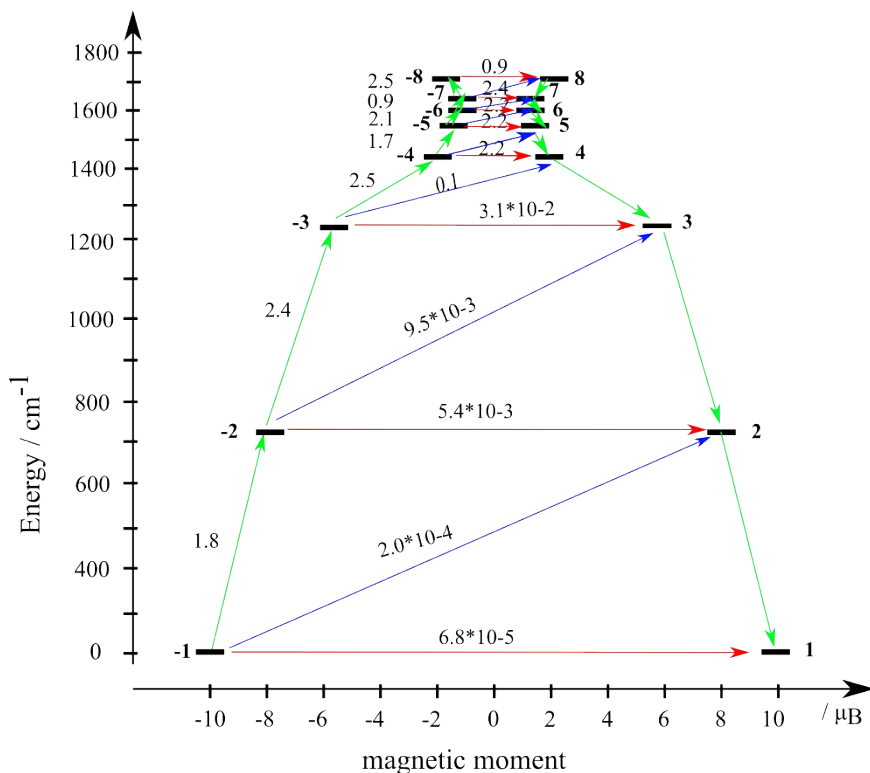

**Figure S18.** The same as in Figure 16 for a geometry modified by elongating the four Dy-O bonds in the equatorial plane.

## References

- [1] Y.-S. Ding, N. F. Chilton, R. E. P. Winpenny, Y.-Z. Zheng, *Angew. Chem. Int. Edit.* **2016**, *55*, 16071-16074.
- [2] F.-S. Guo, B. M. Day, Y.-C. Chen, M.-L. Tong, A. Mansikkamäki, R. A. Layfield, *Science* **2018**, *362*, 1400-1403.
- [3] Y. S. Ding, T. Han, Y. Q. Zhai, D. Reta, N. F. Chilton, R. E. P. Winpenny, Y. Z. Zheng, *Chem. Eur. J.* **2020**, *26*, 5893-5902.
- [4] K.-X. Yu, J. G. Kragsskow, Y.-S. Ding, Y.-Q. Zhai, D. Reta, N. F. Chilton, Y.-Z. Zheng, *Chem* **2020**, *6*, 1777-1793.
- [5] F. Aquilante, J. Autschbach, R. K. Carlson, L. F. Chibotaru, M. G. Delcey, L. De Vico, I. Fdez. Galván, N. Ferré, L. M. Frutos, L. Gagliardi, M. Garavelli, A. Giussani, C. E. Hoyer, G. Li Manni, H. Lischka, D. Ma, P. Å. Malmqvist, T. Müller, A. Nenov, M. Olivucci, T. B. Pedersen, D. Peng, F. Plasser, B. Pritchard, M. Reiher, I. Rivalta, I. Schapiro, J. Segarra-Martí, M. Stenrup, D. G. Truhlar, L. Ungur, A. Valentini, S. Vancoillie, V. Veryazov, V. P. Vysotskiy, O. Weingart, F. Zapata, R. Lindh, *J. Comput. Chem.* **2016**, *37*, 506-541.
- [6] L. Ungur, L. F. Chibotaru, in <http://www.molcas.org/documentation/manual/>, **2006-2013**.
- [7] L. Ungur, L. F. Chibotaru, *Chem. Eur. J.* **2017**, *23*, 3708-3718.
